# Supplementary material for: Serious adverse event rates and reoperation after arthroscopic shoulder surgery: population based cohort study
Source: PubMed Central journal article supplement (PMC9258605; doi:10.1136/bmj-2021-069901), 2022-07-06
Supplement: reej069901.ww.pdf [file reej069901.ww.pdf]

## Supplementary materials

Supplementary figure 1: Number of arthroscopic shoulder procedures performed per financial year 2010 to 2017

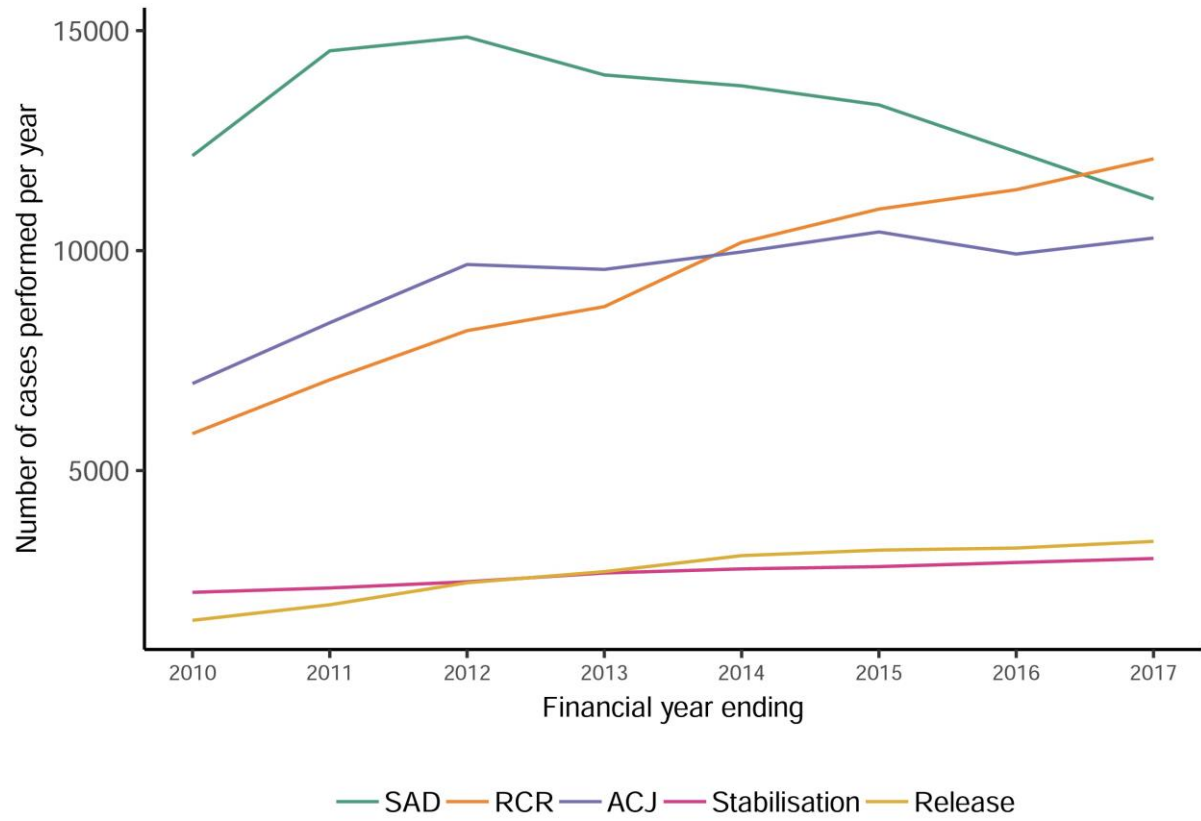

## Risk of any adverse events within 30 days – regression

Outcome: Any adverse event including reoperation

Variables: Age, procedure type, sex, grouped Charlson index

Sample size: 288 250

Events: 1782

Degrees of freedom in final model: 10

Age was modelled with splines. Knots at 28, 50, 60 and 75 years. Non-linear effects of age were significant and preserved. There was no significant interaction between age and procedure type. Inclusion of ethnic origin and IMD did not significantly alter the coefficients and did not improve the models (Likelihood ratio test Chi-squared 10.047 on 6 degrees of freedom,  $p=0.123$ ).

*Supplementary table 1: Coefficients from regression for any adverse event within 30 days*

| <b>Variable</b>      | <b>Odds ratio (95% CI)</b> |
|----------------------|----------------------------|
| Age (46 vs 64 years) | 1.38 (1.20 to 1.58)        |
| SAD                  | Reference                  |
| RCR                  | 1.09 (0.97 to 1.23)        |
| ACJ                  | 1.07 (0.95 to 1.21)        |
| Stabilisation        | 1.17 (0.85 to 1.63)        |
| Release              | 0.90 (0.73 to 1.10)        |
| Male                 | Reference                  |
| Female               | 0.73 (0.66 to 0.80)        |
| Charlson 0           | Reference                  |
| Charlson 1           | 1.59 (1.42 to 1.78)        |
| Charlson 2           | 2.74 (2.44 to 3.08)        |

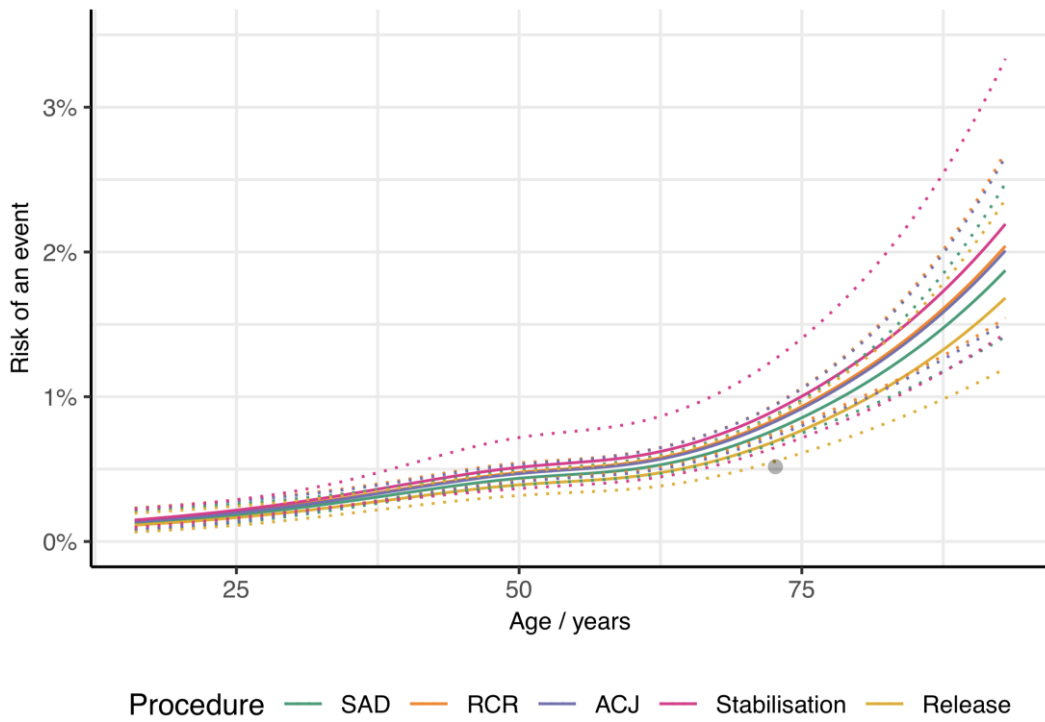

Supplementary figure 2: Non-linear effect of age on risk of adverse events within 30 days, adjusted to male sex and Charlson Index of 0.

## Risk of reoperation within 365 days – regression

Outcome: Any reoperation on ipsilateral shoulder within 365 days

Variables: Age, procedure type, sex, grouped Charlson index

Sample size: 251 418

Events: 10 091

Degrees of freedom in final models: 6

Age was modelled with splines. Non-linear effects of age were significant and preserved. When an initial model was fit, there was a significant interaction between age and procedure type. Therefore, five separate models were fit for each of the procedure types rather than reporting a model with interaction terms since the interpretation is more intuitive.

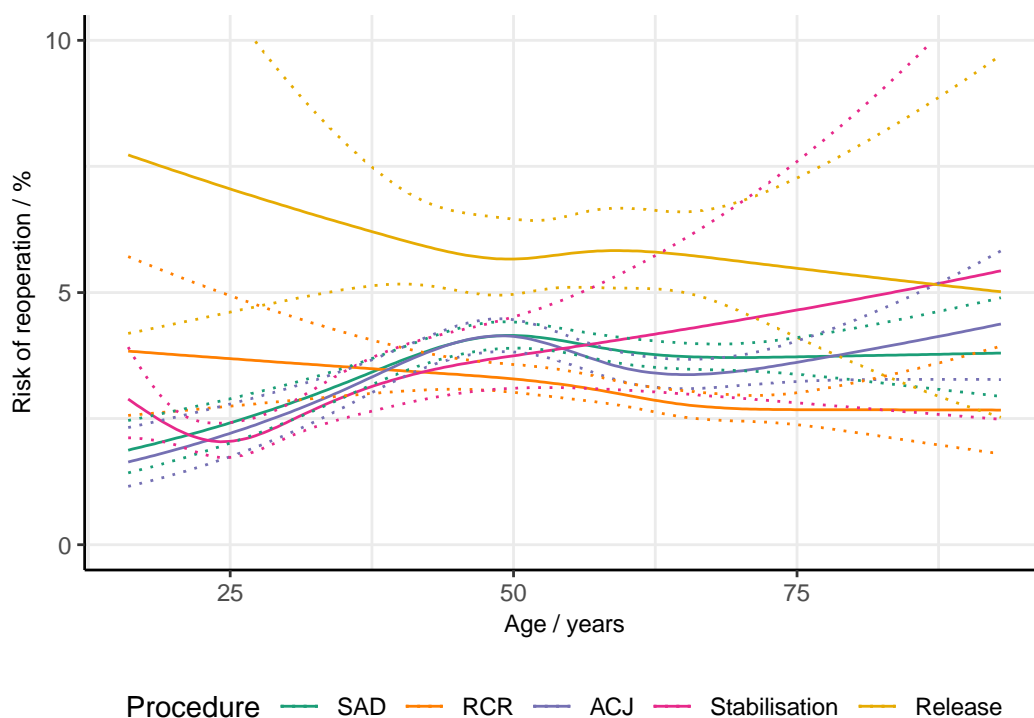

Supplementary figure 3: Partial-effect plot demonstrating the influence of age and procedure type on predicted risk of reoperation within 1 year, adjusted to male sex and Charlson Index of 0.

Supplementary table 2: Coefficients from regression for any reoperation within one year. Values are odds ratios with 95% CIs

| <b>Procedure</b>    | <b>SAD</b>          | <b>RCR</b>          | <b>ACJ</b>          | <b>Release</b>      | <b>Stabilisation</b> |
|---------------------|---------------------|---------------------|---------------------|---------------------|----------------------|
| <b>N</b>            | 91928               | 60463               | 63262               | 17810               | 17955                |
| <b>Events</b>       | 3903                | 2014                | 2623                | 1042                | 509                  |
| <b>Age contrast</b> | 46 vs 63            | 53 vs 68            | 47 vs 64            | 47 vs 59            | 22 vs 35             |
| <b>Age effect</b>   | 0.92 (0.84 to 1.01) | 0.84 (0.75 to 0.95) | 0.82 (0.73 to 0.91) | 1.02 (0.87 to 1.21) | 1.39 (1.12 to 1.72)  |
| <b>Male</b>         | Ref                 | Ref                 | Ref                 | Ref                 | Ref                  |
| <b>Female</b>       | 1.15 (1.08 to 1.22) | 1.11 (1.02 to 1.22) | 1.15 (1.06 to 1.24) | 0.92 (0.81 to 1.04) | 1.17 (0.94 to 1.44)  |
| <b>Charlson 0</b>   | Ref                 | Ref                 | Ref                 | Ref                 | Ref                  |
| <b>Charlson 1</b>   | 1.13 (1.05 to 1.23) | 1.16 (1.04 to 1.29) | 1.15 (1.05 to 1.26) | 1.16 (1.00 to 1.34) | 1.16 (0.91 to 1.47)  |
| <b>Charlson 2</b>   | 1.06 (0.96 to 1.18) | 1.26 (1.11 to 1.44) | 1.17 (1.04 to 1.32) | 1.13 (0.95 to 1.35) | 1.78 (1.12 to 2.83)  |

## Risk of reoperation for infection within 365 days – regression

Outcome: Any reoperation on ipsilateral shoulder for infection within 365 days

Variables: Age, procedure type, sex, diagnosis of diabetes mellitus

Sample size: 251 418

Events: 225

Degrees of freedom in final model: 6

Age was modelled with splines. Knots at 28, 50, 60 and 75 years. Non-linear effects of age were significant and preserved. There was no significant interaction between age and procedure type. Inclusion of ethnic origin and IMD did not significantly alter the coefficients and did not improve the model.

*Supplementary table 3: Coefficients from regression for reoperation for infection within 365 days*

| <b>Variable</b>      | <b>Odds ratio (95% CI)</b> |
|----------------------|----------------------------|
| Age (46 vs 64 years) | 2.14 (1.44 to 3.19)        |
| SAD                  | Reference                  |
| RCR                  | 2.75 (1.97 to 3.83)        |
| ACJ                  | 1.09 (0.72 to 1.66)        |
| Stabilisation        | 1.38 (0.55 to 3.42)        |
| Release              | 0.34 (0.11 to 1.10)        |
| Male                 | Reference                  |
| Female               | 0.19 (0.13 to 0.28)        |
| No diabetes          | Reference                  |
| Diabetes             | 0.99 (0.68 to 1.34)        |

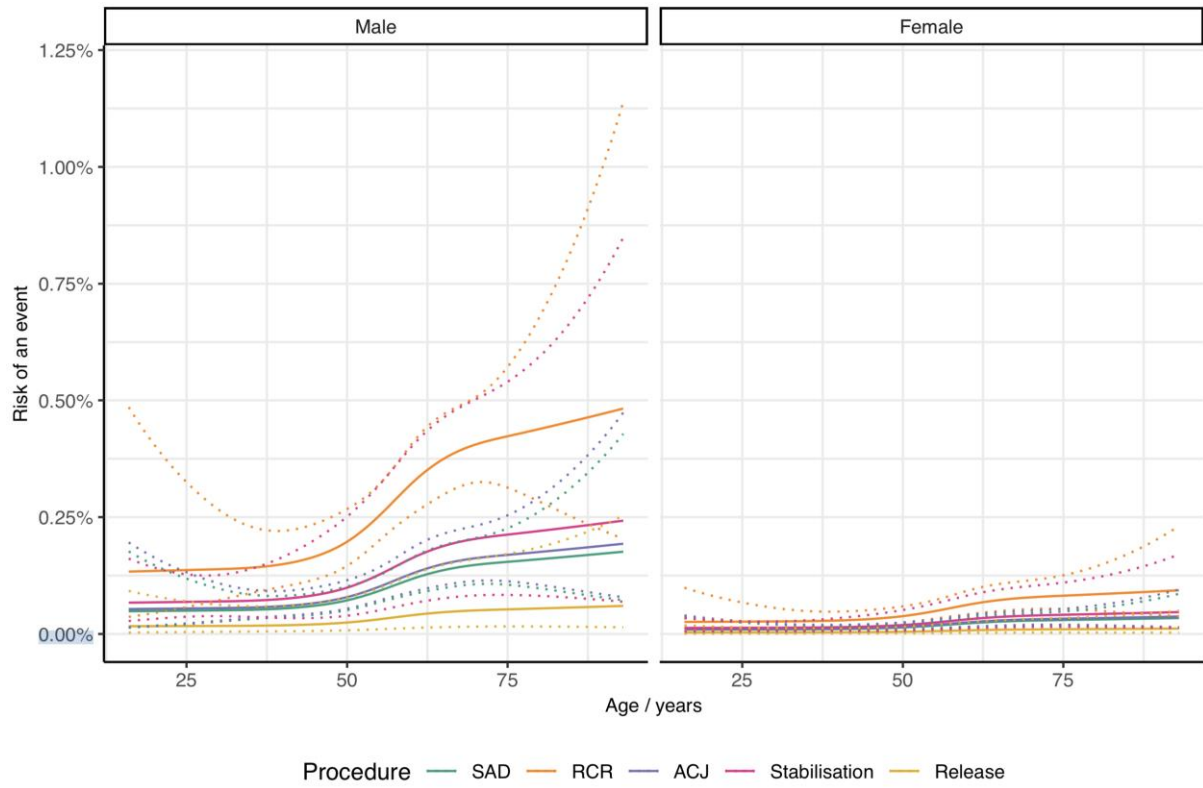

Adjusted to:DM=0

Supplementary figure 4: Partial-effect plot demonstrating the influence of age, sex and procedure type on predicted risk of reoperation for infection within 1 year, adjusted to no diagnosis of diabetes.

## Codes used to identify cases and outcomes

### OPCS-4 CODES (procedures)

#### **Shoulder girdle anatomic codes** (where not otherwise specified)

Z812, Z813, Z814, Z682, Z542

#### **Arthroscopy codes** (where not otherwise specified)

W844, W848, W849, W868, W869, Y767, W888, W889, O198, O199

#### **Procedure codes** (combined with anatomic codes where necessary)

SAD

O291, W844

RCR

Primary: T791, T794

Revision: T793, T795

ACJ excision

W572, W844, W573

Frozen shoulder release

W781, W784, W788, W789

Stabilisation

O271, O278, O279, O272, O273, O274

W721, W722, W723, W724, W725, W726, W728

W731, W732, W733, W734, W738, W739

W741, W742, W743, W748, W749

W751, W752, W753, W758, W759 (open procedure codes only used for reoperations)

W771, W772, W773, W774, W775, W777, W778, W779

W816, W841, W842

Additional codes used to remove cases and produce a more cleanly defined SAD group

*Tenotomy/tenodesis*

T70, T645

*Chondral procedures*

W83, W845, W891, W892, W898, W899, O191

W711, W712, W713, W714

*Synovial procedures*

T711, W691, W692, W693, W694, W695, W698, W699

*Soft tissue recon – SLAP repair*

W847

#### **Laterality of surgery codes**

Z941, Z942, Z943

#### **Reoperations** (in addition to those already stated above)



Debridement/drainage/washout type procedures  
T774, T963, W181, W182, W183, W184, W185, W188  
W336, W337, W338, W339  
W691, W692, W693, W694, W713  
W801, W802, W803, W808, W809  
W813, W814, W817, W818, W819

Bursal procedures including excision  
T621, T622, T626, T628, T629

Excision arthroplasty  
W572

Fasciotomy  
T551, T552

Arthrodesis  
W601, W602, W603, W608, W609  
W611, W612, W613, W614, W618, W619  
W621, W622, W628, W629  
W631, W632, W638, W639  
W641, W642, W648, W649

Manipulation or hydrodistension  
W911, W913, W918, W919, W922

Others, not specified  
W811, W812, W815  
W881, W888, W889  
W921, W923, W924, W925  
O198, O199, W843, W846, W848, W849, W861, W868, W869  
W072, W073, W078  
W928, W929, W588, W589  
O101, W108, W109

Arthroplasty codes (with anatomy codes as needed)  
W491, W494, W501, W504, W511, W515, W581  
W430, W431, W432, W433, W438, W439  
W440, W441, W442, W443, W443, W448, W449  
W450, W451, W452, W453, W454, W458, W459  
W490, W492, W493, W498, W499  
W500, W502, W503, W508, W509  
W510, W512, W513, W514, W518, W519  
W575, W579  
W580, W582  
W960, W961, W962, W963, W964, W965, W966, W968, W969  
W970, W971, W972, W973, W974, W975, W976, W978, W979

W980, W981, W982, W983, W984, W985, W986, W987, W988, W989  
W601, W602, W603, W608, W609  
W611, W612, W613, W618, W619  
W621, W622, W628, W629  
W631, W632, W638, W639  
W641, W642, W648, W649  
O060, O061, O062, O063, O068, O069  
O070, O071, O072, O073, O078, O079  
O080, O082, O083, O084, O081, O088, O089  
X071, X072  
Y037

#### ICD-10 CODES (diagnoses)

(3 or 4 character where required)

Frozen shoulder (adhesive capsulitis)

M750

Infection

M00, M01, M710, M711, M251, M86, T845, T846, T847, T813, T814

Fractures (shoulder girdle only – for exclusion)

S42

W19, W20, W21, W22, W23, W24, W25, W26, W191, W241, W651, W653, W654, W656,  
W661, W663, W664, W671, W673, W677, W332, O172, O173, O175, O178, O179 (\*OPCS  
codes for surgical management of fractures)

Dislocation

S430, S431

W652, W658, W689, W662, W668, W669, W672, W674, W678, W679 (\*OPCS codes for  
relocations)

Tumours of interest

C795, C400, M907, M122, C81, C82, C83, C84, C85, C90, D160

Myocardial infarction

I21, I22

Pulmonary embolism

I26

Lower respiratory tract infection

J12, J13, J14, J15, J16, J18, J20, J22, J86, J440, J851, J690

Acute kidney injury

N17

Urinary tract infection

N10, N300, N308, N309, N390

Cerebrovascular event/stroke

I60, I61, I62, I63, I64

Neurovascular injury

T812 (within same spell only)
